# Supplementary material for: OLR1 Is a Pan-Cancer Prognostic and Immunotherapeutic Predictor Associated with EMT and Cuproptosis in HNSCC
Source: MDPI journal article supplement (doi:10.3390/ijms241612904), 2023-08-17
Supplement: s1 [file s1]

Figure S1: Forest plot showing the correlations between *OLR1* expression and PFI (A) and DSS (B) in various cancers in the TCGA database.

Figure S2: Correlation between *OLR1* expression and immune cell infiltration in various pan-cancer types using (A) XCELL, (B) MCPCOUNTER, and (C) QUANTISEQ algorithms.

Figure S3: Heatmap showing correlations between *OLR1* expression and RNA levels of 39 EMT-related genes in pan-cancer using Spearman's correlation test.

Figure S4: Protein–protein interaction network for *OLR1* using the STRING dataset.
