# Supplementary material for: OLR1 Is a Pan-Cancer Prognostic and Immunotherapeutic Predictor Associated with EMT and Cuproptosis in HNSCC
Source: Int J Mol Sci. 2023 Aug 17;24(16):12904. doi: 10.3390/ijms241612904 (PMC10454104; doi:10.3390/ijms241612904)
Supplement: Supplementary file 1 [file ijms-24-12904-s001.zip]

Archive with 6 entries (6 files):
- Figure Caption.pdf
- Raw Data.zip
- Supplementary_FigureS1.tif
- Supplementary_FigureS2.tif
- Supplementary_FigureS3.tif
- Supplementary_FigureS4.tif
